# Supplementary material for: N-Ethylcarbazole-doped fullerene as a potential candidate for hydrogen storage, a kinetics approach
Source: Royal Society of Chemistry journal article supplement (doi:10.1039/c5ra09264g), 2015-01-01
Supplement: c5ra09264g1.pdf [file c5ra09264g1.pdf]

## Supplementary:

| <b>Table S1. Main geometrical parameters in angstrom and degree at the B3LYP/6-31G (d) level in the gas phase.</b> |         |         |          |          |              |               |         |         |          |          |              |
|--------------------------------------------------------------------------------------------------------------------|---------|---------|----------|----------|--------------|---------------|---------|---------|----------|----------|--------------|
| <b>Step 1</b>                                                                                                      |         |         |          |          |              | <b>Step 2</b> |         |         |          |          |              |
|                                                                                                                    | H65–H66 | C50–C54 | C50–H65  | C54–H66  | H66C54C50H65 |               | H65–H66 | C49–C55 | C49–H65  | C55–H66  | H65C49C55H66 |
| R                                                                                                                  | 0.74279 | 1.43964 | 25.49375 | 25.76662 | 0.25467      | R             | 0.74279 | 1.44351 | 25.38136 | 25.48872 | -1.16085     |
| TS 1                                                                                                               | 1.48172 | 1.52634 | 1.26153  | 1.60926  | 3.14320      | TS 2          | 1.57000 | 1.42000 | 1.45042  | 1.47036  | 2.14345      |
| IM 1                                                                                                               | 2.29311 | 1.60819 | 1.09801  | 1.09697  | 0.05832      | IM 2          | 2.28590 | 1.62380 | 1.09760  | 1.09700  | 3.47794      |
| <b>Step 3</b>                                                                                                      |         |         |          |          |              | <b>Step 4</b> |         |         |          |          |              |
|                                                                                                                    | H67–H68 | C49–C55 | C49–H67  | C55–H68  | H67C49C55H68 |               | H67–H68 | C50–C54 | C50–H67  | C54–H68  | H67C50C54H68 |
| IM 1                                                                                                               | 0.74280 | 1.37880 | 20.02462 | 20.72177 | 1.05596      | IM 2          | 0.74279 | 1.38157 | 10.09701 | 10.01646 | 1.17080      |
| TS 3                                                                                                               | 0.96856 | 1.57883 | 1.41007  | 1.96570  | 2.03237      | TS 4          | 1.26289 | 1.52563 | 1.22591  | 2.46714  | -0.07264     |
| IM 3                                                                                                               | 2.27847 | 1.59807 | 1.09503  | 1.09894  | 9.73668      | IM 3          | 2.27957 | 1.58871 | 1.09497  | 1.09894  | -7.10548     |
| <b>Step 5</b>                                                                                                      |         |         |          |          |              | <b>Step 6</b> |         |         |          |          |              |
|                                                                                                                    | H69–H70 | C46–C53 | C46–H70  | C53–H69  | H69C53C46H70 |               | H67–H68 | C45–C52 | C45–H67  | C52–H68  | H68C52C45H67 |
| IM 3                                                                                                               | 0.74279 | 1.42439 | 12.04381 | 12.44833 | 1.27364      | IM 4          | 0.74279 | 1.38043 | 19.71290 | 20.69387 | 2.96779      |
| TS 5                                                                                                               | 0.84267 | 1.38862 | 1.90000  | 1.57323  | 0.78645      | TS 6          | 1.10425 | 1.53704 | 1.34009  | 2.14189  | -0.49322     |
| IM 4                                                                                                               | 2.29768 | 1.60884 | 1.09811  | 1.09733  | 2.09042      | IM 5          | 2.27904 | 1.59616 | 1.09517  | 1.09908  | -9.82709     |
| <b>Step 7</b>                                                                                                      |         |         |          |          |              | <b>Step 8</b> |         |         |          |          |              |
|                                                                                                                    | H74–H73 | C57–C58 | C57–H73  | C58–H74  | H74C58C57H73 |               | H72–H71 | C56–C59 | C56–H72  | C59–H71  | H71C59C56H72 |
| IM 5                                                                                                               | 0.74279 | 1.36926 | 11.49898 | 12.14062 | -3.47135     | IM 6          | 0.74279 | 1.33625 | 12.55806 | 12.85920 | 2.80621      |
| TS 7                                                                                                               | 2.06409 | 1.51082 | 1.13449  | 1.93176  | -13.25617    | TS 8          | 0.97000 | 1.36676 | 1.74435  | 1.94324  | -4.20058     |
| IM 6                                                                                                               | 2.17851 | 1.59148 | 1.09807  | 1.09392  | -2.64271     | P             | 2.16428 | 1.56457 | 1.09276  | 1.10704  | -20.17012    |

| <b>Table S2. Main geometrical parameters in angstrom and degree at the B3LYP/6-31G (d) level in decalin.</b> |         |         |          |          |              |               |         |         |          |              |
|--------------------------------------------------------------------------------------------------------------|---------|---------|----------|----------|--------------|---------------|---------|---------|----------|--------------|
| <b>Step 1</b>                                                                                                |         |         |          |          |              | <b>Step 2</b> |         |         |          |              |
|                                                                                                              | H65-H66 | C50-C54 | C50-H65  | C54-H66  | H66C54C50H65 | H65-H66       | C49-C55 | C49-H65 | C55-H66  | H65C49C55H66 |
| R                                                                                                            | 0.74293 | 1.43947 | 12.26726 | 12.47615 | -1.62325     | R             | 0.74293 | 1.44339 | 13.52460 | 14.83953     |
| TS 1                                                                                                         | 1.57582 | 1.52501 | 1.16324  | 2.17197  | 3.00972      | TS 2          | 0.98813 | 1.59153 | 1.58848  | 1.32030      |
| IM 1                                                                                                         | 2.29160 | 1.60759 | 1.09761  | 1.09656  | 0.10524      | IM 2          | 2.28590 | 1.62293 | 1.09707  | 1.09633      |
| <b>Step 3</b>                                                                                                |         |         |          |          |              | <b>Step 4</b> |         |         |          |              |
|                                                                                                              | H67-H68 | C49-C55 | C49-H67  | C55-H68  | H67C49C55H68 | H67-H68       | C50-C54 | C50-H67 | C54-H68  | H67C50C54H68 |
| IM 1                                                                                                         | 0.74294 | 1.37877 | 12.00212 | 12.59872 | 1.60553      | IM 2          | 0.74293 | 1.38195 | 10.10112 | 10.01716     |
| TS 3                                                                                                         | 1.12009 | 1.55326 | 1.28325  | 2.34962  | 2.68129      | TS 4          | 1.41386 | 1.51789 | 1.18228  | 2.71785      |
| IM 3                                                                                                         | 2.27868 | 1.59769 | 1.09442  | 1.09832  | 9.69548      | IM 3          | 2.27810 | 1.58796 | 1.09439  | 1.09837      |
| <b>Step 5</b>                                                                                                |         |         |          |          |              | <b>Step 6</b> |         |         |          |              |
|                                                                                                              | H69-H70 | C46-C53 | C46-H70  | C53-H69  | H69C53C46H70 | H67-H68       | C45-C52 | C45-H67 | C52-H68  | H68C52C45H67 |
| IM 3                                                                                                         | 0.74293 | 1.42457 | 12.04385 | 12.44836 | 1.27315      | IM 4          | 0.74293 | 1.38073 | 15.25130 | 15.05599     |
| TS 5                                                                                                         | 2.00458 | 1.51298 | 2.94785  | 1.13627  | -31.70700    | TS 6          | 1.32986 | 1.51933 | 1.21934  | 2.56764      |
| IM 4                                                                                                         | 2.29659 | 1.60971 | 1.09786  | 1.09654  | 2.11869      | IM 5          | 2.27917 | 1.59583 | 1.09469  | 1.09854      |
| <b>Step 7</b>                                                                                                |         |         |          |          |              | <b>Step 8</b> |         |         |          |              |
|                                                                                                              | H74-H73 | C57-C58 | C57-H73  | C58-H74  | H74C58C57H73 | H72-H71       | C56-C59 | C56-H72 | C59-H71  | H71C59C56H72 |
| IM 5                                                                                                         | 0.74293 | 1.36950 | 11.50045 | 12.14342 | -3.47394     | IM 6          | 0.74293 | 1.33630 | 12.56147 | 12.86253     |
| TS 7                                                                                                         | 1.93675 | 1.48190 | 1.13117  | 2.49851  | -1.96193     | TS 8          | 0.97000 | 1.36676 | 1.74435  | 1.94324      |
| IM 6                                                                                                         | 2.17896 | 1.59103 | 1.09750  | 1.09326  | -2.64720     | P             | 2.16461 | 1.56440 | 1.09215  | 1.10612      |

**Table S3. Significant natural bond orbital interactions of the reactant, intermediates and TSs in gas phase and decalin within their second-order perturbation stabilization energies E(2) (kcal. mol<sup>-1</sup>)**

| Step 1             |                      |                       |      |                 |       | Step 2               |                      |                       |       |                 |       |
|--------------------|----------------------|-----------------------|------|-----------------|-------|----------------------|----------------------|-----------------------|-------|-----------------|-------|
|                    |                      | E(2) in the gas phase |      | E(2) in decalin |       |                      |                      | E(2) in the gas phase |       | E(2) in decalin |       |
| Donor              | Acceptor             | R                     | TS1  | R               | TS1   | Donor                | Acceptor             | R                     | TS2   | R               | TS2   |
| $\pi_{C50-C54}$    | $\pi^*_{C26-C35}$    | 3.10                  | 3.07 | 3.11            | 2.90  | $\pi_{C34-C49}$      | $\pi^*_{C49-C55}$    | 1.50                  | 1.40  | 1.51            | 1.00  |
|                    | $\sigma^*_{C50-H65}$ | -----                 | 0.82 | -----           | 2.08  | $\pi_{C42-C55}$      | $\pi^*_{C49-C55}$    | 1.54                  | 1.63  | 1.54            | 1.35  |
|                    | $\pi^*_{C48-C54}$    | 1.64                  | 1.43 | 1.64            | 1.01  | $\pi_{C49-C55}$      | $\pi^*_{C49-C50}$    | 2.96                  | 2.14  | 2.97            | 1.16  |
|                    | $\pi^*_{C49-C50}$    | 2.85                  | 1.90 | 2.89            | 1.55  | $\sigma_{C49-H65}$   | $\pi^*_{C55-C58}$    | -----                 | 4.06  | -----           | ----- |
|                    | $\pi^*_{C54-C57}$    | 2.89                  | 2.66 | 2.90            | 1.77  | $\pi_{C55-C58}$      | $\pi^*_{C49-C55}$    | 2.64                  | 1.57  | 2.63            | 1.60  |
| $\sigma_{C50-H65}$ | $\pi^*_{C26-C35}$    | -----                 | 5.46 | -----           | 4.71  | $\sigma_{C55-H66}$   | $\pi^*_{C34-C49}$    | -----                 | 2.08  | -----           | 0.58  |
|                    | $\sigma^*_{C50-H65}$ | -----                 | 0.63 | -----           | 0.89  |                      | $\pi^*_{C49-C50}$    | -----                 | 2.77  | -----           | ----- |
|                    | $\pi^*_{C54-C57}$    | -----                 | 1.18 | -----           | 0.71  |                      | $\pi^*_{C57-C58}$    | -----                 | 4.44  | -----           | 4.01  |
|                    | $\pi^*_{C49-C55}$    | -----                 | 6.99 | -----           | 6.10  |                      | <b>Step 4</b>        |                       |       |                 |       |
| $\pi_{C54-C57}$    | $\pi^*_{C50-C54}$    | 1.65                  | 2.16 | 2.60            | ----- |                      |                      | E(2) in the gas phase |       | E(2) in decalin |       |
| $\pi_{C35-C50}$    | $\pi^*_{C50-C54}$    | 1.64                  | 1.21 | 1.65            | 1.09  | Donor                | Acceptor             | IM 2                  | TS4   | IM 2            | TS4   |
|                    | $\sigma^*_{C50-H65}$ | -----                 | 0.74 | -----           | 0.71  | $\pi_{C48-C54}$      | $\pi^*_{C50-C54}$    | 2.46                  | 1.37  | 2.45            | 1.35  |
| $\pi_{C48-C54}$    | $\pi^*_{C50-C54}$    | 1.59                  | 1.27 | 1.59            | 1.17  | $\pi_{C50-C54}$      | $\sigma^*_{C50-H65}$ | -----                 | 2.01  | -----           | 1.80  |
|                    | $\sigma^*_{C50-H65}$ | -----                 | 0.88 | -----           | 1.89  |                      | $\pi^*_{C54-C57}$    | 3.25                  | 2.11  | 3.26            | 2.26  |
| $\sigma_{C54-H66}$ | $\sigma^*_{C50-H65}$ | -----                 | 2.06 | -----           | ----- | $\pi^*_{C35-C50}$    | $\pi^*_{C49-C50}$    | 2.08                  | 0.64  | 2.08            | 0.60  |
|                    | <b>Step 3</b>        |                       |      |                 |       |                      | $\pi_{C54-C57}$      | $\pi^*_{C50-C54}$     | 3.34  | 1.99            | 3.37  |
|                    |                      | E(2) in the gas phase |      | E(2) in decalin |       | $\sigma_{C50-H67}$   | $\pi^*_{C26-C35}$    | -----                 | 7.61  | -----           | 6.10  |
| Donor              | Acceptor             | IM 1                  | TS3  | IM 1            | TS3   | $\sigma^*_{C50-H67}$ | $RY^*_{H67}$         | -----                 | 18.89 | -----           | 19.38 |
| $\pi_{C34-C49}$    | $\pi^*_{C49-C55}$    | 2.31                  | 0.81 | 2.30            | 0.99  | $\sigma_{C50-H68}$   | $LP_{H68}$           | -----                 | 11.69 | -----           | 4.97  |
|                    | $\sigma^*_{C50-H67}$ | -----                 | 2.75 | -----           | ----- | $LP_{H68}$           | $\sigma^*_{C50-H67}$ | -----                 | 66.81 | -----           | 44.26 |
| $\pi_{C42-C55}$    | $\pi^*_{C49-C55}$    | 2.70                  | 0.93 | 2.69            | 1.13  | <b>Step 6</b>        |                      |                       |       |                 |       |
|                    | $\pi^*_{C49-C55}$    | 2.74                  | 0.62 | 2.76            | 0.82  |                      |                      | E(2) in the gas phase |       | E(2) in decalin |       |
| $\pi_{C49-C50}$    | $\sigma^*_{C50-H67}$ | -----                 | 0.73 | -----           | 0.77  | Donor                | Acceptor             | IM 4                  | TS 6  | IM              | TS 6  |
|                    | $\pi^*_{C54-C57}$    | 3.45                  | 1.84 | 3.45            | 2.23  |                      |                      |                       |       |                 |       |

|                    |                      |                       |       |                 |       |                    |                      |                       |       |                 |       |
|--------------------|----------------------|-----------------------|-------|-----------------|-------|--------------------|----------------------|-----------------------|-------|-----------------|-------|
|                    | $\pi^*_{C42-C55}$    | 2.23                  | 0.75  | 2.22            | 1.07  | $\pi^*_{C45-C52}$  | 3.39                 | 2.02                  | 3.40  | 4               | 2.14  |
| $\sigma_{C50-H67}$ | $\pi^*_{C49-C55}$    | -----                 | 1.49  | -----           | 1.77  | $\pi_{C45-C46}$    | $\pi^*_{C45-C52}$    | 2.68                  | 0.95  | 2.69            | 0.97  |
| $\sigma_{C54-H68}$ | $\pi^*_{C49-C50}$    | -----                 | 0.88  | -----           | 0.85  |                    | $\sigma^*_{H67-H68}$ | -----                 | 6.02  | -----           | ----- |
| $\pi_{C55-C58}$    | $\pi^*_{C49-C55}$    | 3.25                  | 1.40  | 3.25            | 1.76  | $\pi_{C43-C52}$    | $\pi^*_{C45-C52}$    | 2.61                  | 1.45  | 2.59            | 1.43  |
| <b>Step5</b>       |                      |                       |       |                 |       | $\pi_{C45-C52}$    | $\pi^*_{C43-C52}$    | 2.14                  | 1.18  | 2.13            | 1.30  |
|                    |                      | E(2) in the gas phase |       | E(2) in decalin |       |                    | $\pi^*_{C40-C45}$    | 1.98                  | 1.24  | 1.97            | 1.04  |
| Donor              | Acceptor             | IM 3                  | TS5   | IM 3            | TS5   |                    | $\sigma^*_{H67-H68}$ | -----                 | 9.42  | -----           | ----- |
| $\pi_{C37-C46}$    | $\pi^*_{C46-C53}$    | 1.75                  | 0.67  | 1.76            | 1.33  | $CR_{C52}$         | $RY^*_{C45}$         | 2.02                  | 0.83  | 2.05            | 0.75  |
| $\pi_{C45-C46}$    | $\pi^*_{C46-C53}$    | 2.74                  | 1.50  | 2.74            | 2.13  |                    | $LP_{C52}$           | -----                 | 93.18 | -----           | ----- |
| $\pi_{C53-C56}$    | $\pi^*_{C46-C53}$    | 2.86                  | 2.07  | 2.86            | 1.35  | $\sigma_{H67-H68}$ | $\pi^*_{C52-C59}$    | -----                 | 13.80 | -----           | ----- |
| $CR_{C53}$         | $RY^*_{C46}$         | 1.24                  | 2.47  | -----           | 0.80  | <b>Step 8</b>      |                      |                       |       |                 |       |
| $CR_{C46}$         | $\pi^*_{C46-C53}$    | 0.77                  | 1.21  | -----           | ----- |                    |                      | E(2) in the gas phase |       | E(2) in decalin |       |
| $\pi_{C46-C53}$    | $\sigma^*_{H69-H70}$ | -----                 | 11.24 | -----           | ----- | Donor              | Acceptor             | IM 6                  | TS 8  | IM 6            | TS 8  |
| $\pi^*_{C46-C53}$  | $\sigma^*_{H69-H70}$ | -----                 | 17.26 | -----           | ----- | $\pi_{C52-C59}$    | $\pi^*_{C56-C59}$    | 4.61                  | 3.73  | 4.59            | 3.72  |
| <b>Step 7</b>      |                      |                       |       |                 |       | $\pi_{C53-C56}$    | $\pi^*_{C56-C59}$    | 4.91                  | 2.36  | 4.88            | 2.36  |
|                    |                      | E(2) in the gas phase |       | E(2) in decalin |       | $\pi_{C56-C57}$    | $\pi^*_{C56-C59}$    | 3.29                  | 1.62  | 3.30            | 1.63  |
| Donor              | Acceptor             | IM 5                  | TS 7  | IM 5            | TS 7  | $CR_{C56}$         | $\pi^*_{C56-C59}$    | 1.58                  | 1.16  | 1.58            | 1.15  |
| $\pi_{C54-C57}$    | $\pi^*_{C57-C58}$    | 3.89                  | 1.33  | 1.27            | 1.47  | $CR_{C59}$         | $RY^*_{C56}$         | 2.52                  | 1.60  | 2.52            | 1.57  |
|                    | $\sigma^*_{C57-H73}$ | -----                 | 0.64  | -----           | 1.65  |                    | $\pi^*_{C56-C59}$    | 1.91                  | 1.65  | 1.91            | 1.66  |
| $\pi_{C55-C58}$    | $\pi^*_{C57-C58}$    | 4.02                  | 0.99  | 4.02            | 1.84  | $\pi_{C56-C59}$    | $\sigma^*_{H71-H72}$ | -----                 | 9.13  | -----           | ----- |
|                    | $\sigma^*_{C58-H74}$ | -----                 | 0.53  | -----           | ----- | $\sigma_{H71-H72}$ | $\pi^*_{C56-C59}$    | -----                 | 0.29  | -----           | 0.28  |
| $\pi_{C56-C57}$    | $\pi^*_{C57-C58}$    | 3.59                  | 1.16  | 3.58            | 1.08  | $\pi^*_{C56-C59}$  | $\sigma^*_{H71-H72}$ | -----                 | 19.82 | -----           | 20.73 |
|                    | $\sigma^*_{C57-H73}$ | -----                 | 0.69  | -----           | 1.30  |                    |                      |                       |       |                 |       |
|                    | $\sigma^*_{C58-H74}$ | -----                 | 0.68  | -----           | ----- |                    |                      |                       |       |                 |       |
| $\pi_{C57-C58}$    | $\sigma^*_{C57-H73}$ | -----                 | 1.04  | -----           | 1.19  |                    |                      |                       |       |                 |       |
| $\sigma_{C58-H73}$ | $\sigma^*_{C58-H74}$ | -----                 | 3.35  | -----           | 1.34  |                    |                      |                       |       |                 |       |
| $\sigma_{C58-H74}$ | $\sigma^*_{C58-H74}$ | -----                 | 2.89  | -----           | ----- |                    |                      |                       |       |                 |       |

**Table S5. Natural Electron Configuration of the reactant, intermediates and TSs in gas phase and decalin**

| GAS           | * DECALIN                       |                           |                      |                      | GAS           | DECALIN                         |                           |                      |                      |
|---------------|---------------------------------|---------------------------|----------------------|----------------------|---------------|---------------------------------|---------------------------|----------------------|----------------------|
|               | R/ IM                           | TS                        | R/ IM                | TS                   |               | R/ IM                           | TS                        | R/ IM                | TS                   |
|               | [core]2s(0.86)                  | [core]2s(0.95)            | [core]2s(0.86)       | [core]2s(0.95)       |               | [core]2s(0.87)                  | [core]2s(0.95)            | [core]2s(0.87)       | [core]2s(0.88)       |
| <b>Step 1</b> | C5<br>)<br>2p(3.15)<br>3p(0.01) | )<br>2p(3.35)<br>3p(0.02) | 2p(3.15)<br>3p(0.01) | 2p(3.37)<br>3p(0.01) | <b>Step 2</b> | C4<br>)<br>2p(3.11)<br>3p(0.01) | )<br>2p(3.26)<br>3p(0.02) | 2p(3.11)<br>3p(0.01) | 2p(3.28)<br>3p(0.01) |

**TABLE S4. SELECTED PARTIAL CHARGES FROM THE NPA ANALYSIS OF THE REACTANTS AND TSS IN THE GAS PHASE AND DECALIN, RESPECTIVELY.**

| STEP 1 |        |        |       |         |        |        |       | STEP 2 |      |        |        |         |        |        |        |        |        |
|--------|--------|--------|-------|---------|--------|--------|-------|--------|------|--------|--------|---------|--------|--------|--------|--------|--------|
| Gas    |        |        |       | Decalin |        |        |       | Gas    |      |        |        | Decalin |        |        |        |        |        |
|        | C50    | C54    | H65   | H66     | C50    | C54    | H65   | H66    |      | C49    | C55    | H65     | H66    | C49    | C55    | H65    | H66    |
| R      | -0.027 | 0.011  | 0.000 | -0.000  | -0.029 | 0.010  | 0.000 | -0.000 | R    | 0.009  | -0.066 | 0.000   | -0.000 | 0.008  | -0.066 | 0.0003 | 0.00   |
| TS 1   | -0.312 | -0.096 | 0.330 | -0.007  | -0.331 | 0.110  | 0.326 | -0.329 | TS 2 | -0.236 | -0.248 | 0.202   | 0.215  | -0.179 | -0.245 | 0.436  | 0.261  |
| Step 3 |        |        |       |         |        |        |       | Step 4 |      |        |        |         |        |        |        |        |        |
| Gas    |        |        |       | Decalin |        |        |       | Gas    |      |        |        | Decalin |        |        |        |        |        |
|        | C49    | C55    | H67   | H68     | C49    | C55    | H67   | H68    |      | C50    | C54    | H67     | H68    | C50    | C54    | H67    | H68    |
| IM 1   | 0.032  | -0.049 | 0.000 | 0.000   | 0.034  | -0.049 | 0.000 | 0.000  | IM 2 | -0.031 | 0.004  | 0.000   | 0.000  | -0.032 | 0.004  | -0.000 | 0.000  |
| TS 3   | -0.165 | 0.007  | 0.279 | 0.284   | -0.260 | 0.114  | 0.193 | -0.196 | TS 4 | -0.305 | 0.164  | 0.236   | 0.254  | -0.318 | 0.172  | 0.275  | -0.414 |
| Step 5 |        |        |       |         |        |        |       | Step 6 |      |        |        |         |        |        |        |        |        |
| Gas    |        |        |       | Decalin |        |        |       | Gas    |      |        |        | Decalin |        |        |        |        |        |
|        | C46    | C53    | H69   | H70     | C46    | C53    | H69   | H70    |      | C52    | C45    | H67     | H68    | C52    | C45    | H67    | H68    |
| IM 3   | -0.029 | 0.004  | 0.000 | 0.000   | -0.031 | 0.002  | 0.000 | -0.000 | IM4  | -0.023 | -0.006 | -0.000  | 0.000  | -0.022 | -0.008 | 0.000  | 0.000  |
| TS 5   | 0.019  | -0.134 | 0.053 | -0.042  | 0.082  | -0.301 | 0.297 | -0.378 | TS 6 | 0.153  | -0.293 | 0.205   | -0.195 | 0.188  | -0.317 | 0.263  | -0.416 |
| Step 7 |        |        |       |         |        |        |       | Step 8 |      |        |        |         |        |        |        |        |        |
| Gas    |        |        |       | Decalin |        |        |       | Gas    |      |        |        | Decalin |        |        |        |        |        |
|        | C57    | C58    | H73   | H74     | C57    | C58    | H73   | H74    |      | C56    | C59    | H71     | H72    | C56    | C59    | H71    | H72    |
| IM 5   | -0.087 | 0.168  | 0.000 | 0.000   | -0.089 | 0.167  | 0.000 | 0.000  | IM 6 | -0.104 | 0.208  | 0.001   | -0.001 | -0.104 | 0.206  | 0.000  | 0.000  |
| TS 7   | -0.311 | 0.222  | 0.326 | -0.204  | -0.349 | 0.496  | 0.374 | -0.753 | TS 8 | -0.231 | 0.298  | 0.172   | 0.098  | -0.234 | 0.298  | -0.176 | 0.098  |

|               |         |                                             |                                             |                                        |                                         |               |         |                                             |                                         |                                        |                                                       |
|---------------|---------|---------------------------------------------|---------------------------------------------|----------------------------------------|-----------------------------------------|---------------|---------|---------------------------------------------|-----------------------------------------|----------------------------------------|-------------------------------------------------------|
|               | C5<br>4 | [core]2s(0.87)<br>)<br>2p(3.11)<br>3p(0.01) | [core]2s(0.88)<br>)<br>2p(3.19)<br>3p(0.02) | [core]2s(0.87)<br>2p(3.11)<br>3p(0.01) | [core] 2s(0.88)<br>2p(3.00)<br>3p(0.01) |               | C5<br>5 | [core]2s(0.87)<br>)<br>2p(3.18)<br>3p(0.01) | [core]2s(0.96)<br>2p(3.27)<br>3p(0.02)  | [core]2s(0.87)<br>2p(3.18)<br>3p(0.01) | [core]2S( 0.95)<br>2p( 3.27)3p<br>(0.01)<br>3d( 0.01) |
|               | H6<br>5 | 1s(1.00)                                    | 1S(0.67)                                    | 1s(1.00)                               | 1S(0.67)2S(1.01<br>)                    |               | H6<br>5 | 1s(1.00)                                    | 1s(0.80)                                | 1s(1.00)                               | 1S( 0.56)                                             |
|               | H6<br>6 | 1s(1.00)                                    | 1S(1.01)                                    | 1s(1.00)                               | 1S(1.33)                                |               | H6<br>6 | 1s(1.00)                                    | 1s(0.78)                                | 1s(1.00)                               | 1S( 0.73) 2S(<br>0.01)                                |
| <b>Step 3</b> | C4<br>9 | [core]2s(0.87)<br>)<br>2p(3.08)<br>3p(0.01) | [core]2s(0.95)<br>)<br>2p(3.19)<br>3p(0.02) | [core]2s(0.87)<br>2p(3.08)<br>3p(0.01) | [core]2s(0.96)<br>2p(3.28)<br>3p(0.02)  | <b>Step 4</b> | C5<br>0 | [core]2s(0.86)<br>)<br>2p(3.15)<br>3p(0.01) | [core]2s(0.96)<br>2p(3.33)<br>3p(0.02)  | [core]2s(0.86)<br>2p(3.15)<br>3p(0.01) | [core]2s(0.96)<br>2p(3.34)<br>3p(0.01)                |
|               | C5<br>5 | [core]2s(0.87)<br>)<br>2p(3.17)<br>3p(0.01) | [core]2s(0.90)<br>)<br>2p(3.07)<br>3p(0.01) | [core]2s(0.87)<br>2p(3.17)<br>3p(0.01) | [core]2s(0.89)<br>2p(2.98)<br>3p(0.01)  |               | C5<br>4 | [core]2s(0.87)<br>)<br>2p(3.11)<br>3p(0.01) | [core]2s(0.88)<br>2p(2.94)<br>3p(0.01)  | [core]2s(0.87)<br>2p(3.11)<br>3p(0.01) | [core]2s(0.87)<br>2p(3.18)<br>3p(0.01)                |
|               | H6<br>7 | 1s(1.00)                                    | 1s(0.72)                                    | 1s(1.00)                               | 1s(0.81)                                |               | H6<br>7 | 1s(1.00)                                    | 1s(0.76)2s(0.0<br>1)                    | 1s(1.00)                               | 1s(0.72)2s(0.01)                                      |
|               | H6<br>8 | 1s(1.00)                                    | 1s(0.71)                                    | 1s(1.00)                               | 1s(1.14)                                |               | H6<br>8 | 1s(1.00)                                    | 1s(1.25)                                | 1s(1.00)                               | 1s(1.41)                                              |
| <b>Step 5</b> | C5<br>3 | [core]2s(0.86)<br>)<br>2p(3.11)<br>3p(0.01) | [core]2s(0.95)<br>)<br>2p(3.17)<br>3p(0.01) | [core]2s(0.87)<br>2p(3.15)<br>3p(0.01) | [core]2s(0.86)<br>2p(3.04)<br>3p(0.01)  | <b>Step 6</b> | C4<br>5 | [core]2s(0.87)<br>)<br>2p(3.12)<br>3p(0.01) | [core]2s(0.95)<br>2p(3.32)<br>3p(0.02)  | [core]2s(0.87)<br>2p(3.13)<br>3p(0.01) | [core]2s(0.96)<br>2p(3.33)<br>3p(0.02)                |
|               | C4<br>6 | [core]2s(0.87)<br>)<br>2p(3.15)<br>3p(0.01) | [core]2s(0.95)<br>)<br>2p(3.02)<br>3p(0.01) | [core]2s(0.87)<br>2p(3.12)<br>3p(0.01) | [core]2s(0.96)<br>2p(3.33)<br>3p(0.01)  |               | C5<br>2 | [core]2s(0.87)<br>)<br>2p(3.14)<br>3p(0.01) | [core]2s(0.89)<br>2p(2.942)<br>3p(0.01) | [core]2s(0.87)<br>2p(3.14)<br>3p(0.01) | [core]2s(0.88)<br>2p(2.91)<br>3p(0.01)                |
|               | H6<br>9 | 1s(1.00)                                    | 1s(0.95)                                    | 1s(1.00)                               | 1s(0.70)2s(0.01)                        |               | H6<br>7 | 1s(1.00)                                    | 1s(0.79)                                | 1s(1.00)                               | 1s(0.73)2s(0.01)                                      |
|               | H7<br>0 | 1s(1.00)                                    | 1s(1.04)                                    | 1s(1.00)                               | 1s(1.38)                                |               | H6<br>8 | 1s(1.00)                                    | 1s(1.19)                                | 1s(1.00)                               | 1s(1.42)                                              |
| <b>Step 7</b> | C5<br>7 | [core]2s(0.84)<br>) 2p(3.23)<br>3p(0.01)    | [core]2s(0.95)<br>)<br>2p(3.35)<br>3p(0.01) | [core]2s(0.84)<br>2p(3.23)<br>3p(0.01) | [core]2s(0.95)<br>2p(3.38)<br>3p(0.01)  | <b>Step 8</b> | C5<br>6 | [core]2s(0.84)<br>)<br>2p(3.25)<br>3p(0.01) | [core]2s(0.94)<br>2p(3.27)<br>3p(0.02)  | [core]2s(0.84)<br>2p(3.25)<br>3p(0.01) | [core]2s(0.94)<br>2p(3.28)<br>3p(0.02)                |
|               | C5<br>8 | [core]2s(0.81)<br>)<br>2p(3.23)             | [core]2s(0.89)<br>)<br>2p(2.86)             | [core]2s(0.81)<br>2p(3.01)<br>3p(0.01) | [core]2s(0.83)<br>2p(2.65)<br>3p(0.02)  |               | C5<br>9 | [core]2s(0.81)<br>)<br>2p(2.96)             | [core]2s(0.81)<br>2p(2.87)<br>3p(0.01)  | [core]2s(0.81)<br>2p(2.97)<br>3p(0.01) | [core]2s(0.81)<br>2p(2.87)<br>3p(0.01)                |

|    | 3p(0.01) | 3p(0.02) |          | 3d(0.01)         |    | 3p(0.01) | 3d(0.01) | 3d(0.01) | 3d(0.01) |
|----|----------|----------|----------|------------------|----|----------|----------|----------|----------|
| H6 | 1s(1.00) | 1s(0.95) | 1s(1.00) | 1s(0.62)2s(0.01) | H7 | 1s(1.00) | 1s(1.17) | 1s(1.00) | 1s(1.71) |
| 9  |          |          |          |                  | 1  |          |          |          |          |
| H7 | 1s(1.00) | 1s(1.04) | 1s(1.00) | 1s(1.75)         | H7 | 1s(1.00) | 1s(0.90) | 1s(1.00) | 1s(0.90) |
| 0  |          |          |          |                  | 2  |          |          |          |          |

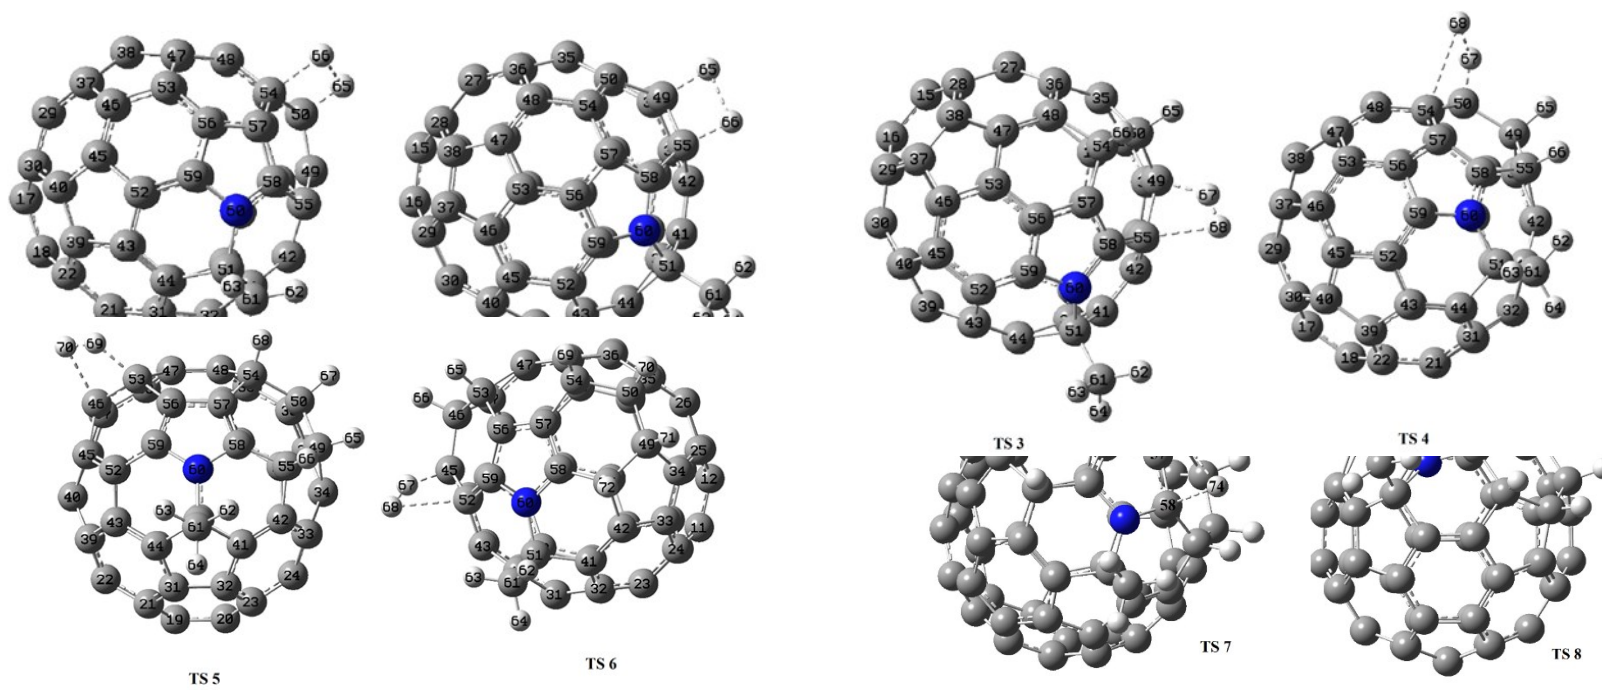

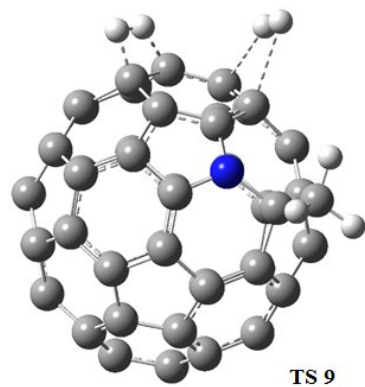

Figure S1. Optimized structures of the TSs in the hydrogen storage pathways in Scheme 1 for NEC doped fullerene in the gas phase.



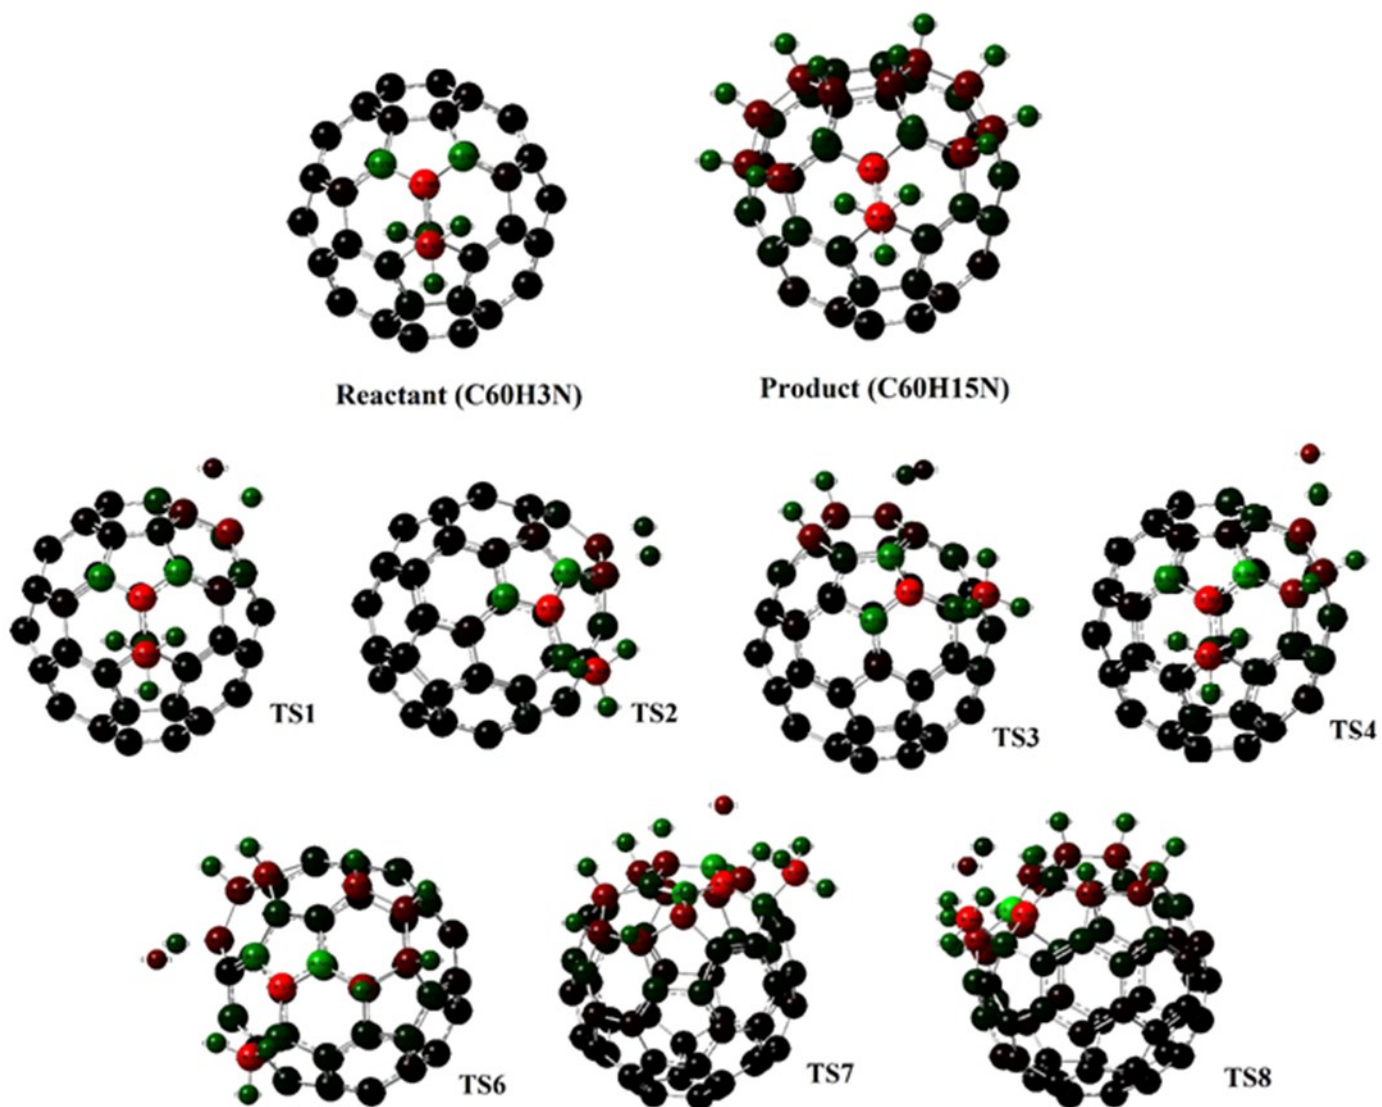

Figure S2. Mulliken analysis of the reactant, product and transition states in the gas phase (acceptor in red and donor in green color).

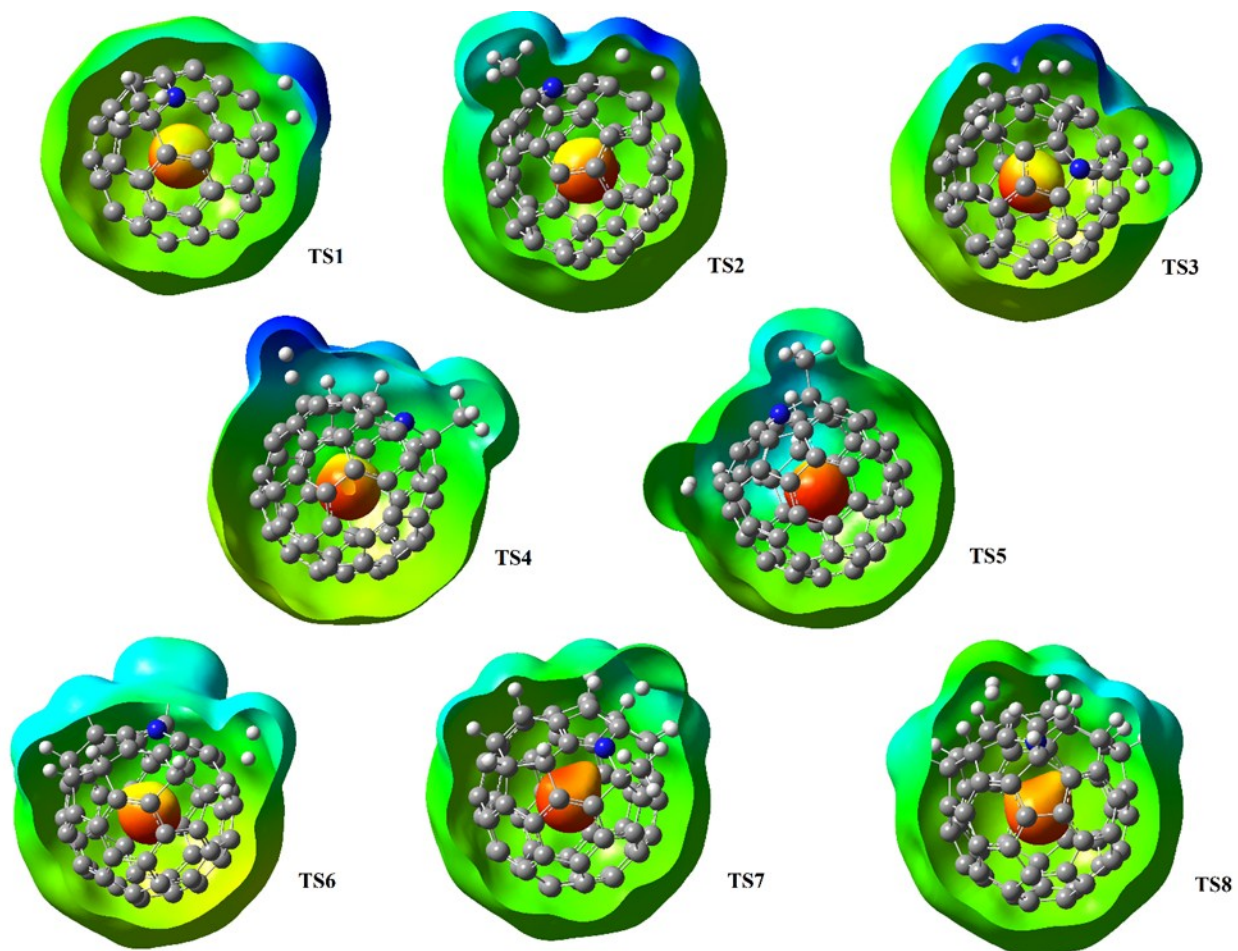

Figure S3. Electron density from total SCF density mapped with ESP of the reactant, product and transition states in the gas phase.
